# Supplementary material for: A place for play? The influence of the home physical environment on children’s physical activity and sedentary behaviour
Source: Springer Nature journal article supplement (doi:10.1186/1479-5868-10-99), 2013-01-01
Supplement: 12966_2012_792_MOESM1_ESM.pdf [file 12966_2012_792_MOESM1_ESM.pdf]

## Search Terms

Keywords (truncated): Adolescent OR child OR youth OR young people OR teen OR boys OR girls (Level 1); AND Energy expenditure OR sedentary OR physical activity OR inactivity OR active play OR outdoor play OR television OR sitting OR video game OR electronic game OR computer (Level 2); AND Home OR house OR indoor OR outdoor OR physical environment OR built environment OR social environment (Level 3).

Limits: English Language; Peer Reviewed; 2005 to 2011

## Electronic Database Search Results

Web of Science – **2014 articles**; Medline – **2182 articles**; SportDiscus – **439 articles**; PsychINFO – **723 articles**.

**Result: 5358 Articles**

Remove duplicates: 1844

**Result: 3514 Articles**

Remove articles not in peer reviewed journal: 38

**Result: 3476 Articles**

**3476** Articles screened by title  
Excluded: **2806**

**670** Articles screened by abstract  
Excluded: **498**

**172** Full articles screened  
Excluded: **130**

**TOTAL in Review: 49**  
Cross-sectional: 33  
Longitudinal: 5  
Intervention: 11

**Additional Articles**  
Article references lists: 2  
Reviews: 4  
Other sources: 1
